# Supplementary material
Source: Springer Nature journal article supplement (https://www.springermedizin.de/resource/supplementary/13099_2012_64_MOESM4_ESM.pdf/9665514)

**A.**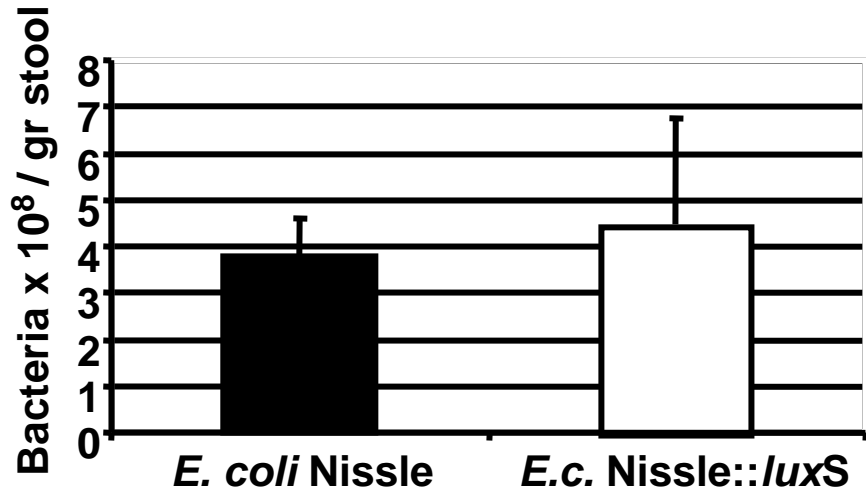**B.**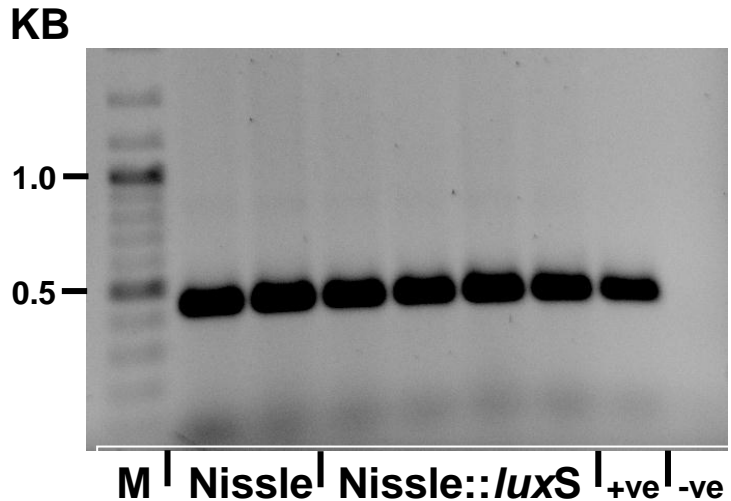

Supplement: MOESM4 [file 9665514]
